# Supplementary material for: Detection of prostate-specific antigen in semen using DNA aptamers: an application of nucleic acid aptamers in forensic body fluid identification
Source: Royal Society of Chemistry journal article supplement (doi:10.1039/d0ay00371a), 2020-01-01
Supplement: d0ay00371a1.pdf [file d0ay00371a1.pdf]

Supplementary information

**Detection of prostate-specific antigen in semen using DNA aptamers: an application of  
nucleic acid aptamers in forensic body fluid identification**

Tetsuya Satoh<sup>a,\*</sup>, Seiya Kouroki<sup>a</sup>, Yusuke Kitamura<sup>b</sup>, Toshihiro Ihara<sup>b</sup>, Kazutoshi Matsumura<sup>a</sup> and  
Susumu Iwase<sup>a</sup>

<sup>a</sup>*Forensic Science Laboratory, Kumamoto Prefectural Police Headquarters, 6-18-1 Suizenji, Chuo-ku,  
Kumamoto 862-8610, Japan*

<sup>b</sup>*Division of Materials Science and Chemistry, Faculty of Advanced Science and Technology, Kumamoto  
University, 2-39-1 Kurokami, Chuo-ku, Kumamoto 860-8555, Japan*

Tetsuya Satoh, Seiya Kouroki, Kazutoshi Matsumura, Susumu Iwase: [kasoken@police.pref.kumamoto.jp](mailto:kasoken@police.pref.kumamoto.jp)

Yusuke Kitamura: [ykita@kumamoto-u.ac.jp](mailto:ykita@kumamoto-u.ac.jp)

Toshihiro Ihara: [toshi@chem.kumamoto-u.ac.jp](mailto:toshi@chem.kumamoto-u.ac.jp)

\*To whom correspondence should be addressed.

Forensic Science Laboratory, Kumamoto Prefectural Police Headquarters, 6-18-1 Suizenji, Chuo-ku,  
Kumamoto 862-8610, Japan

Tel: +81 96 381 0110

Fax: +81 96 381 0110

E-mail: [kasoken@police.pref.kumamoto.jp](mailto:kasoken@police.pref.kumamoto.jp)

## Hemoglobin-binding DNA Aptamer

The specificity of two 72-mer DNA oligonucleotides for blood from body fluids (blood, semen, saliva, urine, sweat, vaginal secretion) was examined. The oligonucleotides were biotin-labeled at their 5'-end, and the specificity was examined by ELONA. The sequences are as follows.

### Hb aptamer No.1

5' – GGCAGGAAGACAAACACCAGGTGAGGGAGACGACGCGAGTGTTAGATGGTAGCTGTTGGTC-  
TGTGGTGCTGT – 3'

### Hb aptamer No.2

5' – ACAGCACACAGACCAACAGCTACCATCTAACACTCGCGTCGTCTCCCTCACCTGGTGTTG-  
TCTTCCTGCC – 3'

(A)

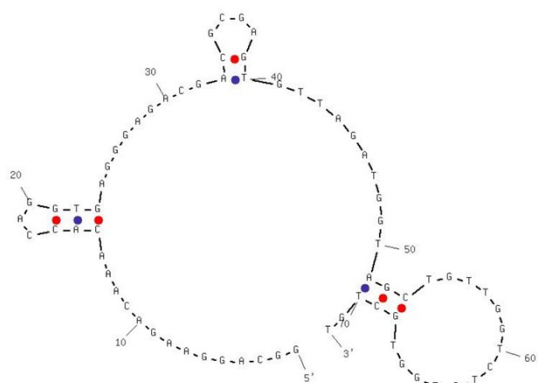

(B)

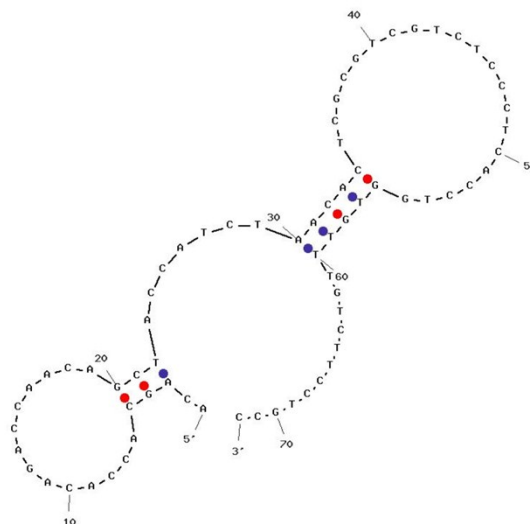

Fig. S1 Predictions of the most stable secondary structures of 72mer DNA oligonucleotides (A) Hb aptamer

No.1 (B) Hb aptamer No.2. The secondary structures were predicted by Oligo Analyzer Version 3.1 software,

and their  $\Delta G$  values were  $-5.08 \text{ kcal mol}^{-1}$  and  $-4.09 \text{ kcal mol}^{-1}$ , respectively.

| Ct                |          |          |          |          |          |          | $\Delta$ Ct       |          |          |          |          |          |          |          |  |
|-------------------|----------|----------|----------|----------|----------|----------|-------------------|----------|----------|----------|----------|----------|----------|----------|--|
| Blood             |          |          |          |          |          |          | Blood             |          |          |          |          |          |          |          |  |
| Dilution Factor   | 1        | 2        | 3        | 4        | 5        | Average  | Dilution Factor   | 1        | 2        | 3        | 4        | 5        | Average  | SD       |  |
| × 100             | 30.59859 | 30.72241 | 29.08351 | 30.34104 | 31.29961 | 30.40903 | × 100             | -1.69713 | -1.57331 | -3.21221 | -1.95468 | -0.99611 | 1.934078 | 0.819893 |  |
| × 1000            | 30.36125 | 29.69796 | 30.62374 | 30.16388 | 30.18003 | 30.20537 | × 1000            | -1.93447 | -2.59776 | -1.67198 | -2.13184 | -2.11569 | 2.129318 | 0.338807 |  |
| × 10000           | 31.04502 | 29.63845 | 31.2708  | 30.31689 | 30.81842 | 30.61792 | × 10000           | -1.2507  | -2.65727 | -1.02492 | -1.97883 | -1.4773  | 1.78458  | 0.651699 |  |
| × 100000          | 31.33663 | 31.09942 | 31.30963 | 30.29636 | 31.55151 | 31.11871 | × 100000          | -0.95909 | -1.1963  | -0.98609 | -1.99936 | -0.74421 | 1.23149  | 0.486797 |  |
| Semen             |          |          |          |          |          |          | Semen             |          |          |          |          |          |          |          |  |
| Dilution Factor   | 1        | 2        | 3        | 4        | 5        | Average  | Dilution Factor   | 1        | 2        | 3        | 4        | 5        | Average  | SD       |  |
| × 100             | 21.45375 | 21.00876 | 20.04816 | 19.88708 | 20.36861 | 20.55327 | × 100             | -10.842  | -11.287  | -12.2476 | -12.4086 | -11.9271 | 11.74245 | 0.661699 |  |
| × 1000            | 24.1754  | 24.2114  | 22.89834 | 22.60442 | 23.37691 | 23.45329 | × 1000            | -8.12032 | -8.08432 | -9.39738 | -9.6913  | -8.91881 | 8.842426 | 0.729821 |  |
| × 10000           | 27.22483 | 29.64789 | 28.61595 | 28.8323  | 29.12061 | 28.68832 | × 10000           | -5.07089 | -2.64783 | -3.67977 | -3.46342 | -3.17511 | 3.607404 | 0.904906 |  |
| × 100000          | 32.2838  | 32.64747 | 31.62076 | 31.952   | 31.62977 | 32.02676 | × 100000          | -0.01192 | 0.35175  | -0.67496 | -0.34372 | -0.66595 | 0.26896  | 0.441412 |  |
| Saliva            |          |          |          |          |          |          | Saliva            |          |          |          |          |          |          |          |  |
| Dilution Factor   | 1        | 2        | 3        | 4        | 5        | Average  | Dilution Factor   | 1        | 2        | 3        | 4        | 5        | Average  | SD       |  |
| × 100             | 24.9094  | 30.28649 | 28.34942 | 27.02665 | 28.84188 | 28.62611 | × 100             | -7.38632 | -0.25792 | -2.19499 | -3.51776 | -1.70253 | 1.9183   | 2.709135 |  |
| × 1000            | 29.67179 | 28.1325  | 29.02339 | 29.41941 | 30.93997 | 29.43741 | × 1000            | -2.62393 | -2.41191 | -1.52102 | -1.125   | 0.39556  | 1.165593 | 1.206221 |  |
| × 10000           | 30.46093 | 31.48419 | 31.05487 | 30.80034 | 28.09174 | 30.37841 | × 10000           | -1.83479 | 0.93978  | 0.51046  | 0.25593  | -2.45267 | 0.186625 | 1.521405 |  |
| × 100000          | 31.61162 | 31.01933 | 28.39113 | 30.24556 | 30.61406 | 30.37634 | × 100000          | -0.6841  | 0.47492  | -2.15328 | -0.29885 | 0.06965  | 0.47689  | 1.010072 |  |
| Urine             |          |          |          |          |          |          | Urine             |          |          |          |          |          |          |          |  |
| Dilution Factor   | 1        | 2        | 3        | 4        | 5        | Average  | Dilution Factor   | 1        | 2        | 3        | 4        | 5        | Average  | SD       |  |
| × 100             | 31.68953 | 29.09391 | 31.55892 | 29.17027 | 27.5362  | 29.80977 | × 100             | 1.14512  | -1.4505  | 1.01451  | -1.37414 | -3.00821 | 0.734644 | 1.780699 |  |
| × 1000            | 31.42474 | 32.03217 | 28.15218 | 29.953   | 32.14045 | 30.74051 | × 1000            | 0.88033  | 1.48776  | -2.39223 | -0.59141 | 1.59604  | -0.1961  | 1.68938  |  |
| × 10000           | 31.33521 | 30.73311 | 30.44569 | 31.14104 | 30.80018 | 30.89105 | × 10000           | 0.7908   | 0.1887   | -0.09872 | 0.59663  | 0.25577  | -0.34664 | 0.350471 |  |
| × 100000          | 29.78504 | 33.29053 | 28.16635 | 30.98774 | 30.82074 | 30.61008 | × 100000          | -0.75937 | 2.74612  | -2.37806 | 0.44333  | 0.27633  | -0.06567 | 1.872453 |  |
| Sweat             |          |          |          |          |          |          | Sweat             |          |          |          |          |          |          |          |  |
| Dilution Factor   | 1        | 2        | 3        | 4        | 5        | Average  | Dilution Factor   | 1        | 2        | 3        | 4        | 5        | Average  | SD       |  |
| × 100             | 30.06103 | 33.41594 | 31.8965  | 30.01217 | 30.66107 | 31.20934 | × 100             | -0.48338 | 1.12022  | -0.39922 | -2.28355 | -1.63465 | 0.736116 | 1.306261 |  |
| × 1000            | 33.14231 | 30.94997 | 32.10131 | 31.19628 | 29.40065 | 31.3581  | × 1000            | 2.5979   | -1.34575 | -0.19441 | -1.09944 | -2.89507 | 0.587354 | 2.028743 |  |
| × 10000           | 32.72204 | 31.64239 | 31.71271 | 32.00256 | 31.5049  | 31.91692 | × 10000           | 2.17763  | -0.65333 | -0.58301 | -0.29316 | -0.79082 | 0.028538 | 1.246603 |  |
| × 100000          | 33.13022 | 31.77835 | 31.98372 | 26.52201 | 30.82317 | 30.84749 | × 100000          | 2.58581  | -0.51737 | -0.312   | -5.77371 | -1.47255 | 1.097964 | 3.021917 |  |
| Vaginal secretion |          |          |          |          |          |          | Vaginal Secretion |          |          |          |          |          |          |          |  |
| Dilution Factor   | 1        | 2        | 3        | 4        | 5        | Average  | Dilution Factor   | 1        | 2        | 3        | 4        | 5        | Average  | SD       |  |
| × 100             | 26.85601 | 29.66229 | 30.73665 | 26.27146 | 25.36695 | 27.77867 | × 100             | -3.6884  | -0.88212 | 0.19224  | -6.02426 | -6.92877 | 3.466262 | 3.108218 |  |
| × 1000            | 28.84622 | 31.81331 | 32.59149 | 29.45574 | 28.5008  | 30.24151 | × 1000            | -1.69819 | 1.2689   | 2.04708  | -2.83998 | -3.79492 | 1.003422 | 2.555246 |  |
| × 10000           | 32.45535 | 33.20383 | 32.80976 | 31.95367 | 30.66546 | 32.21761 | × 10000           | 1.91094  | 2.65942  | 2.26535  | -0.34205 | -1.63026 | -0.97268 | 1.864151 |  |
| × 100000          | 37.00951 | 34.34871 | 35.02484 | 30.87988 | 35.16357 | 34.4853  | × 100000          | 6.4651   | 3.8043   | 4.48043  | -1.41584 | 2.86785  | -3.24037 | 2.918635 |  |
| No body fluid     |          |          |          |          |          |          |                   |          |          |          |          |          |          |          |  |
| Plate 1           | 32.29572 |          |          |          |          |          |                   |          |          |          |          |          |          |          |  |
| Plate 2           | 30.54441 |          |          |          |          |          |                   |          |          |          |          |          |          |          |  |

Sheet 1  $C_t$  and  $\Delta C_t$  values of blood, semen, saliva, urine, sweat, and vaginal secretion
